# Supplementary material for: Metabolomic analysis of tomato seed germination
Source: PubMed Central journal article supplement (PMC5653705; doi:10.1007/s11306-017-1284-x), 2017-10-23
Supplement: 11306_2017_1284_MOESM3_ESM.pdf [file 11306_2017_1284_MOESM3_ESM.pdf]

# Chromosome 1

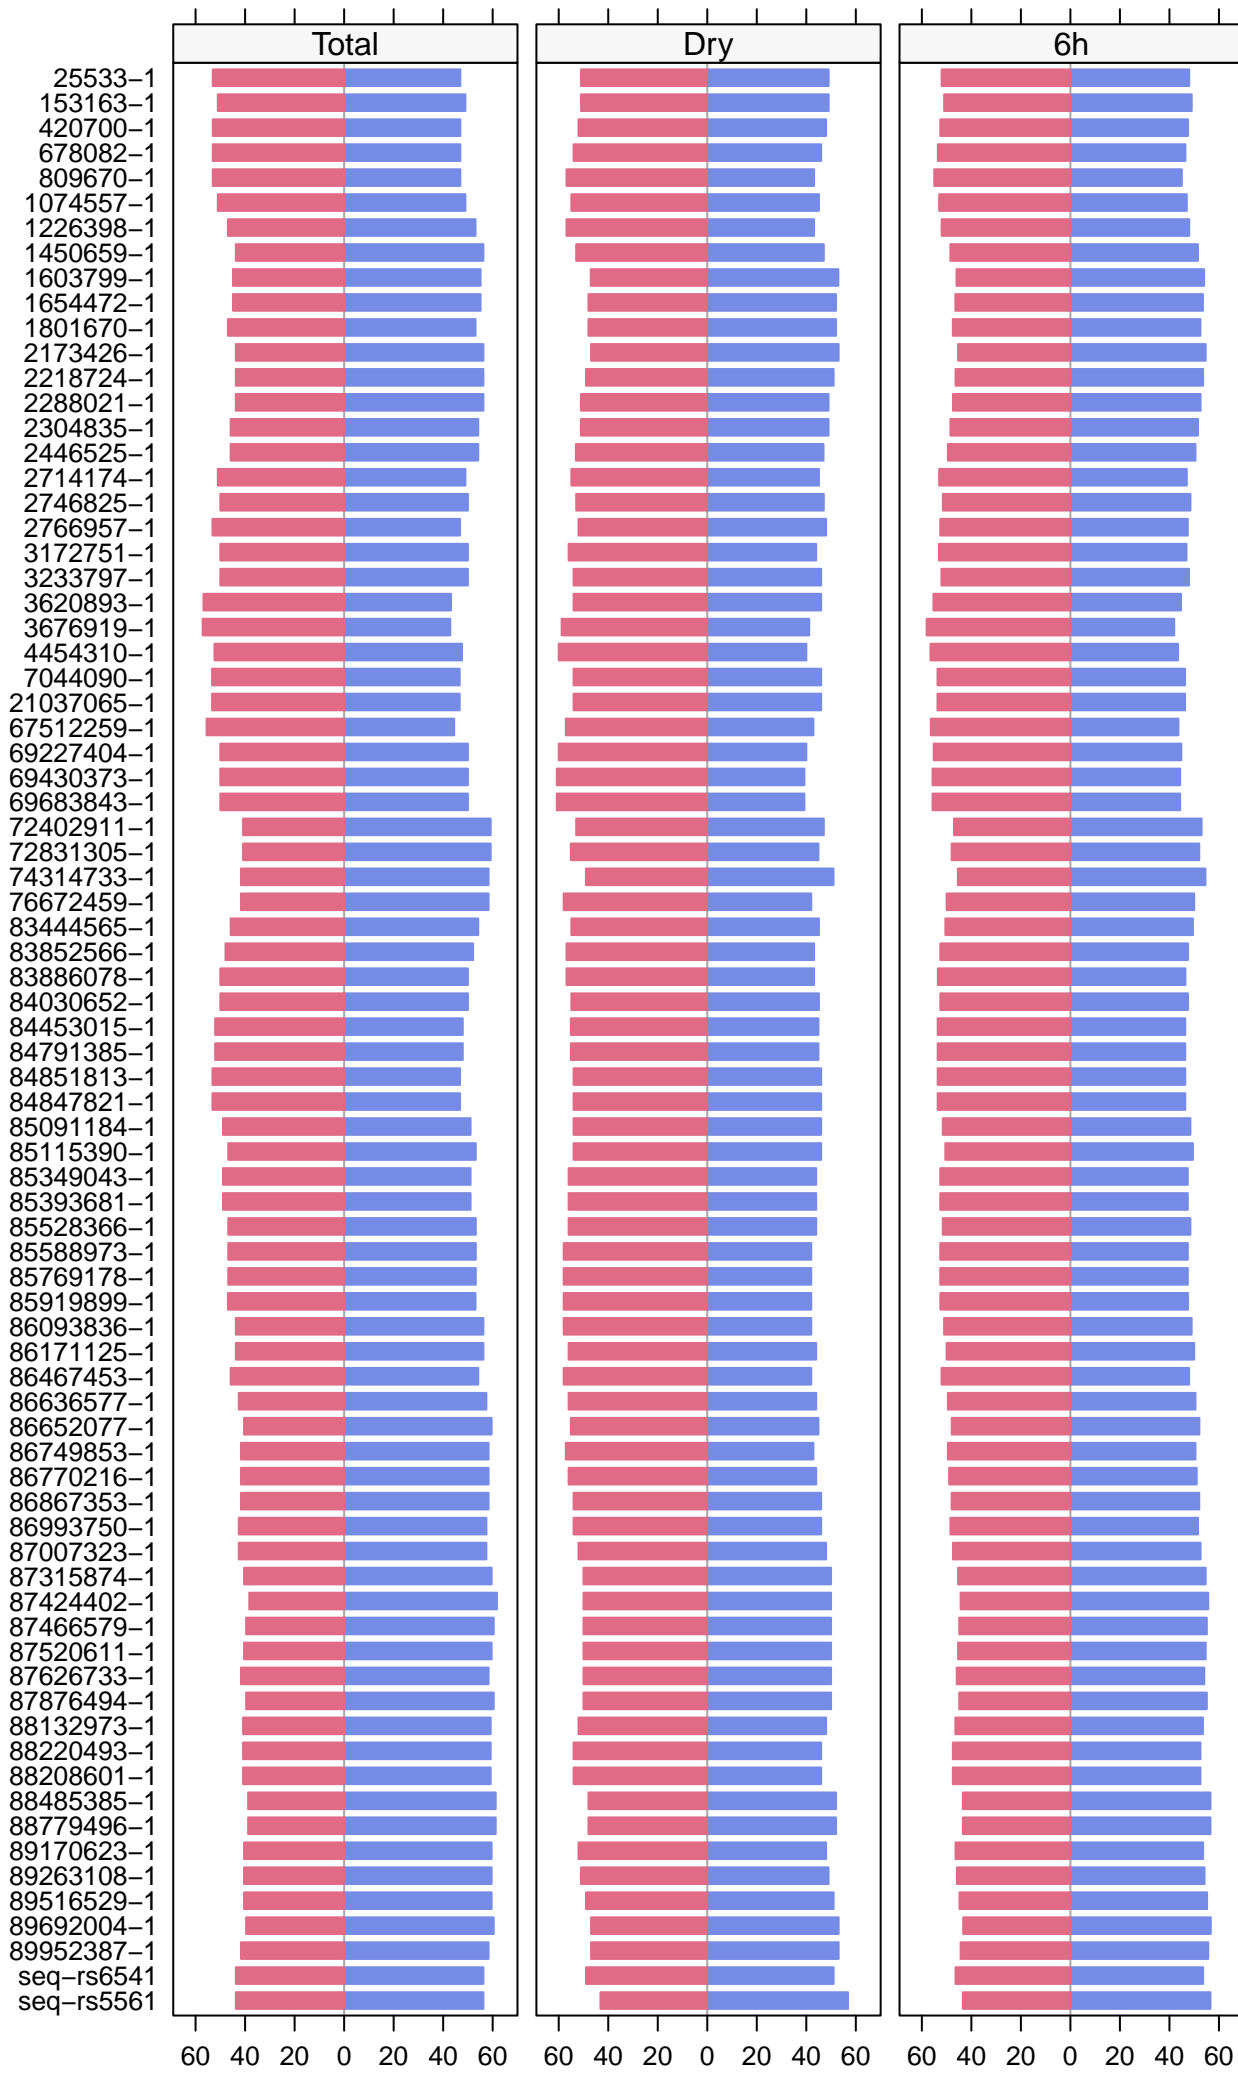

# Chromosome 2

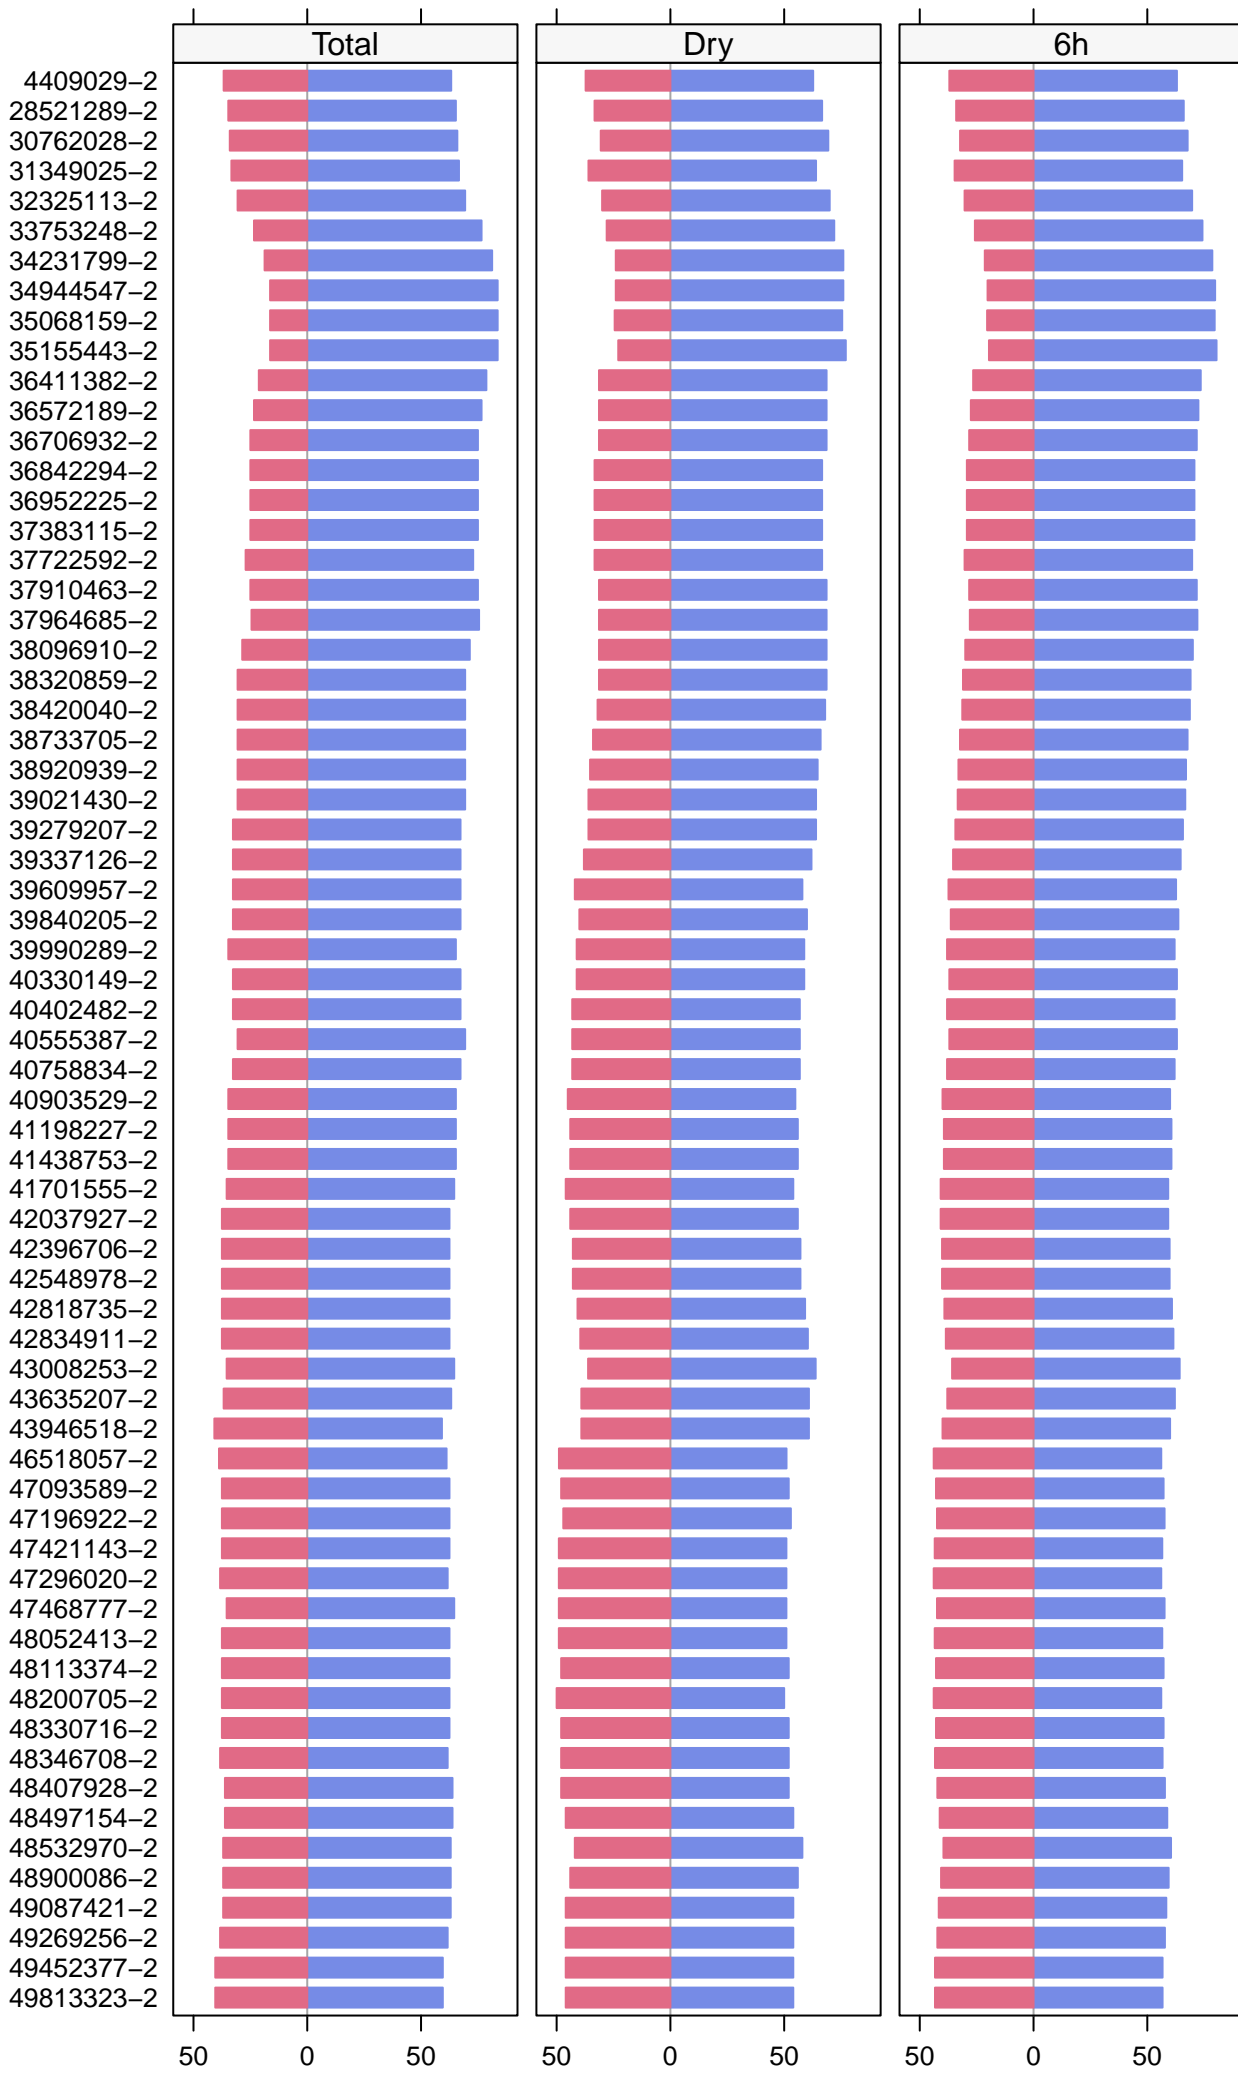

Allele  
A B

# Chromosome 3

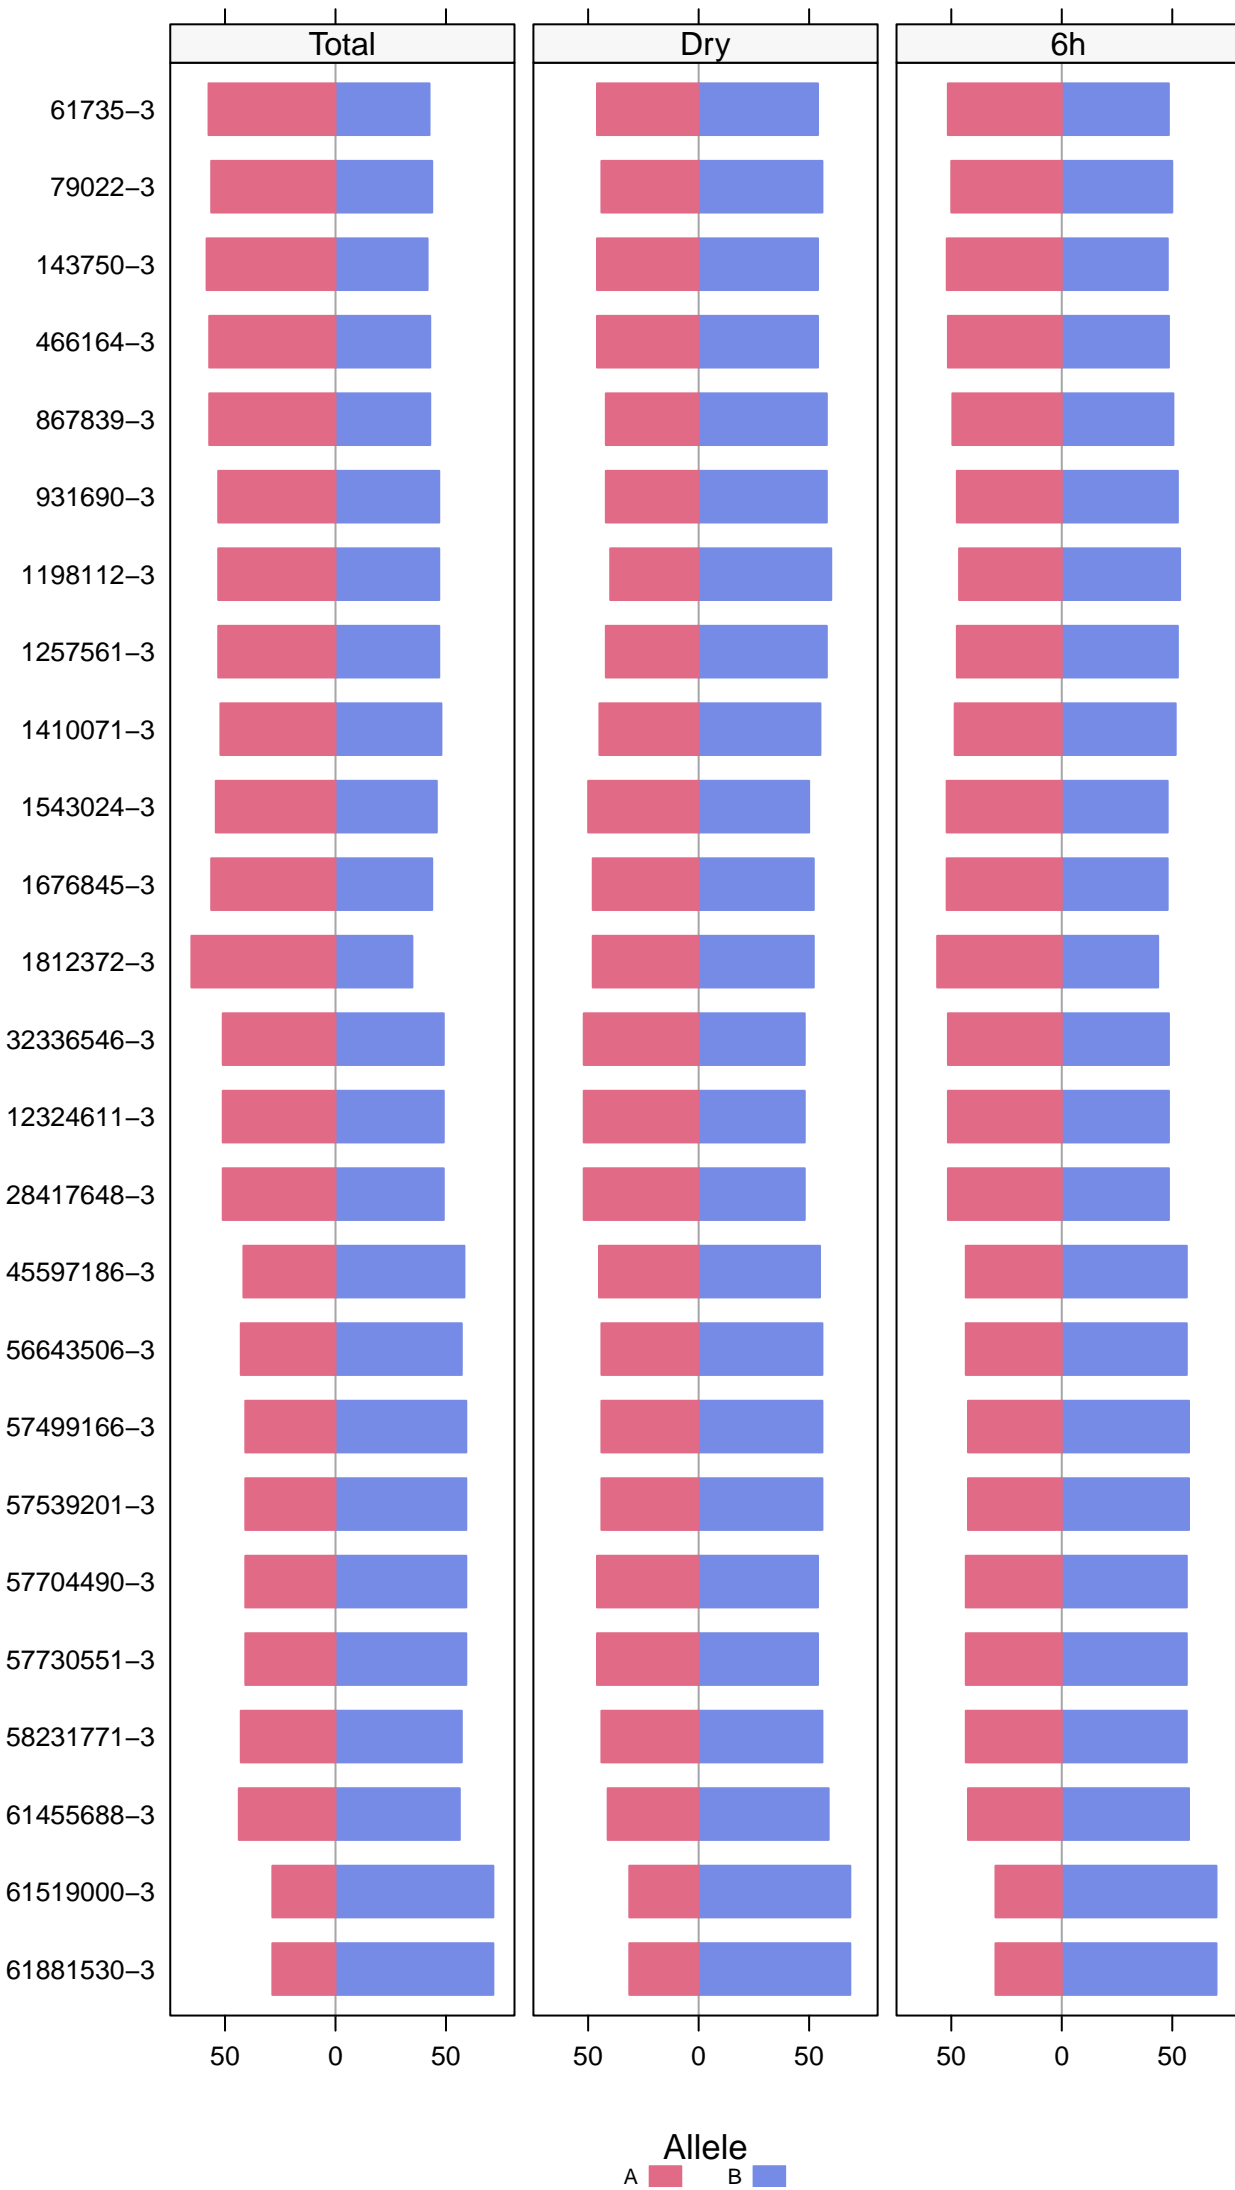

# Chromosome 4

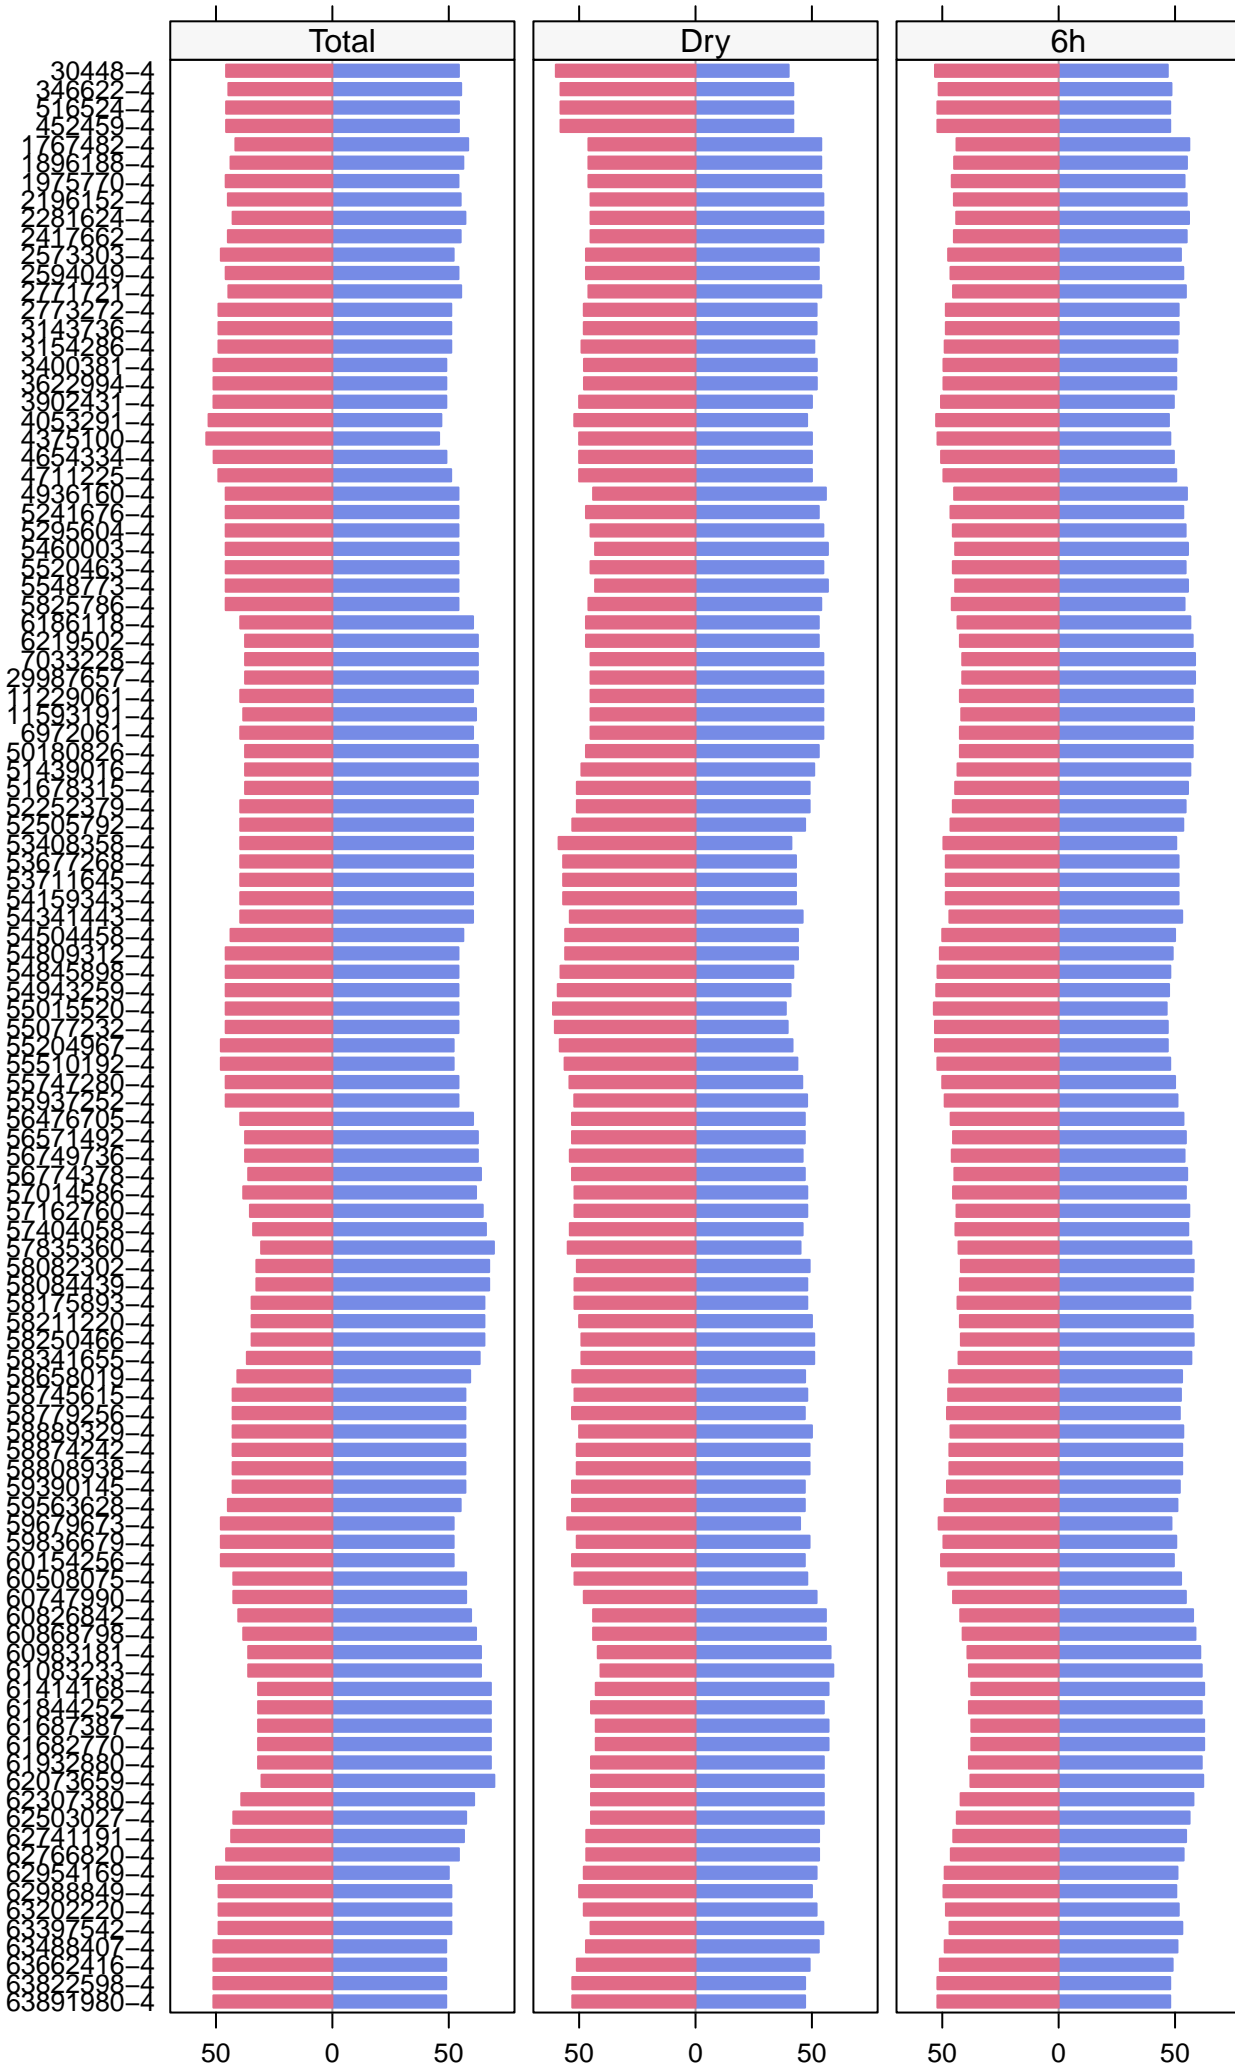

Allele  
A B

# Chromosome 5

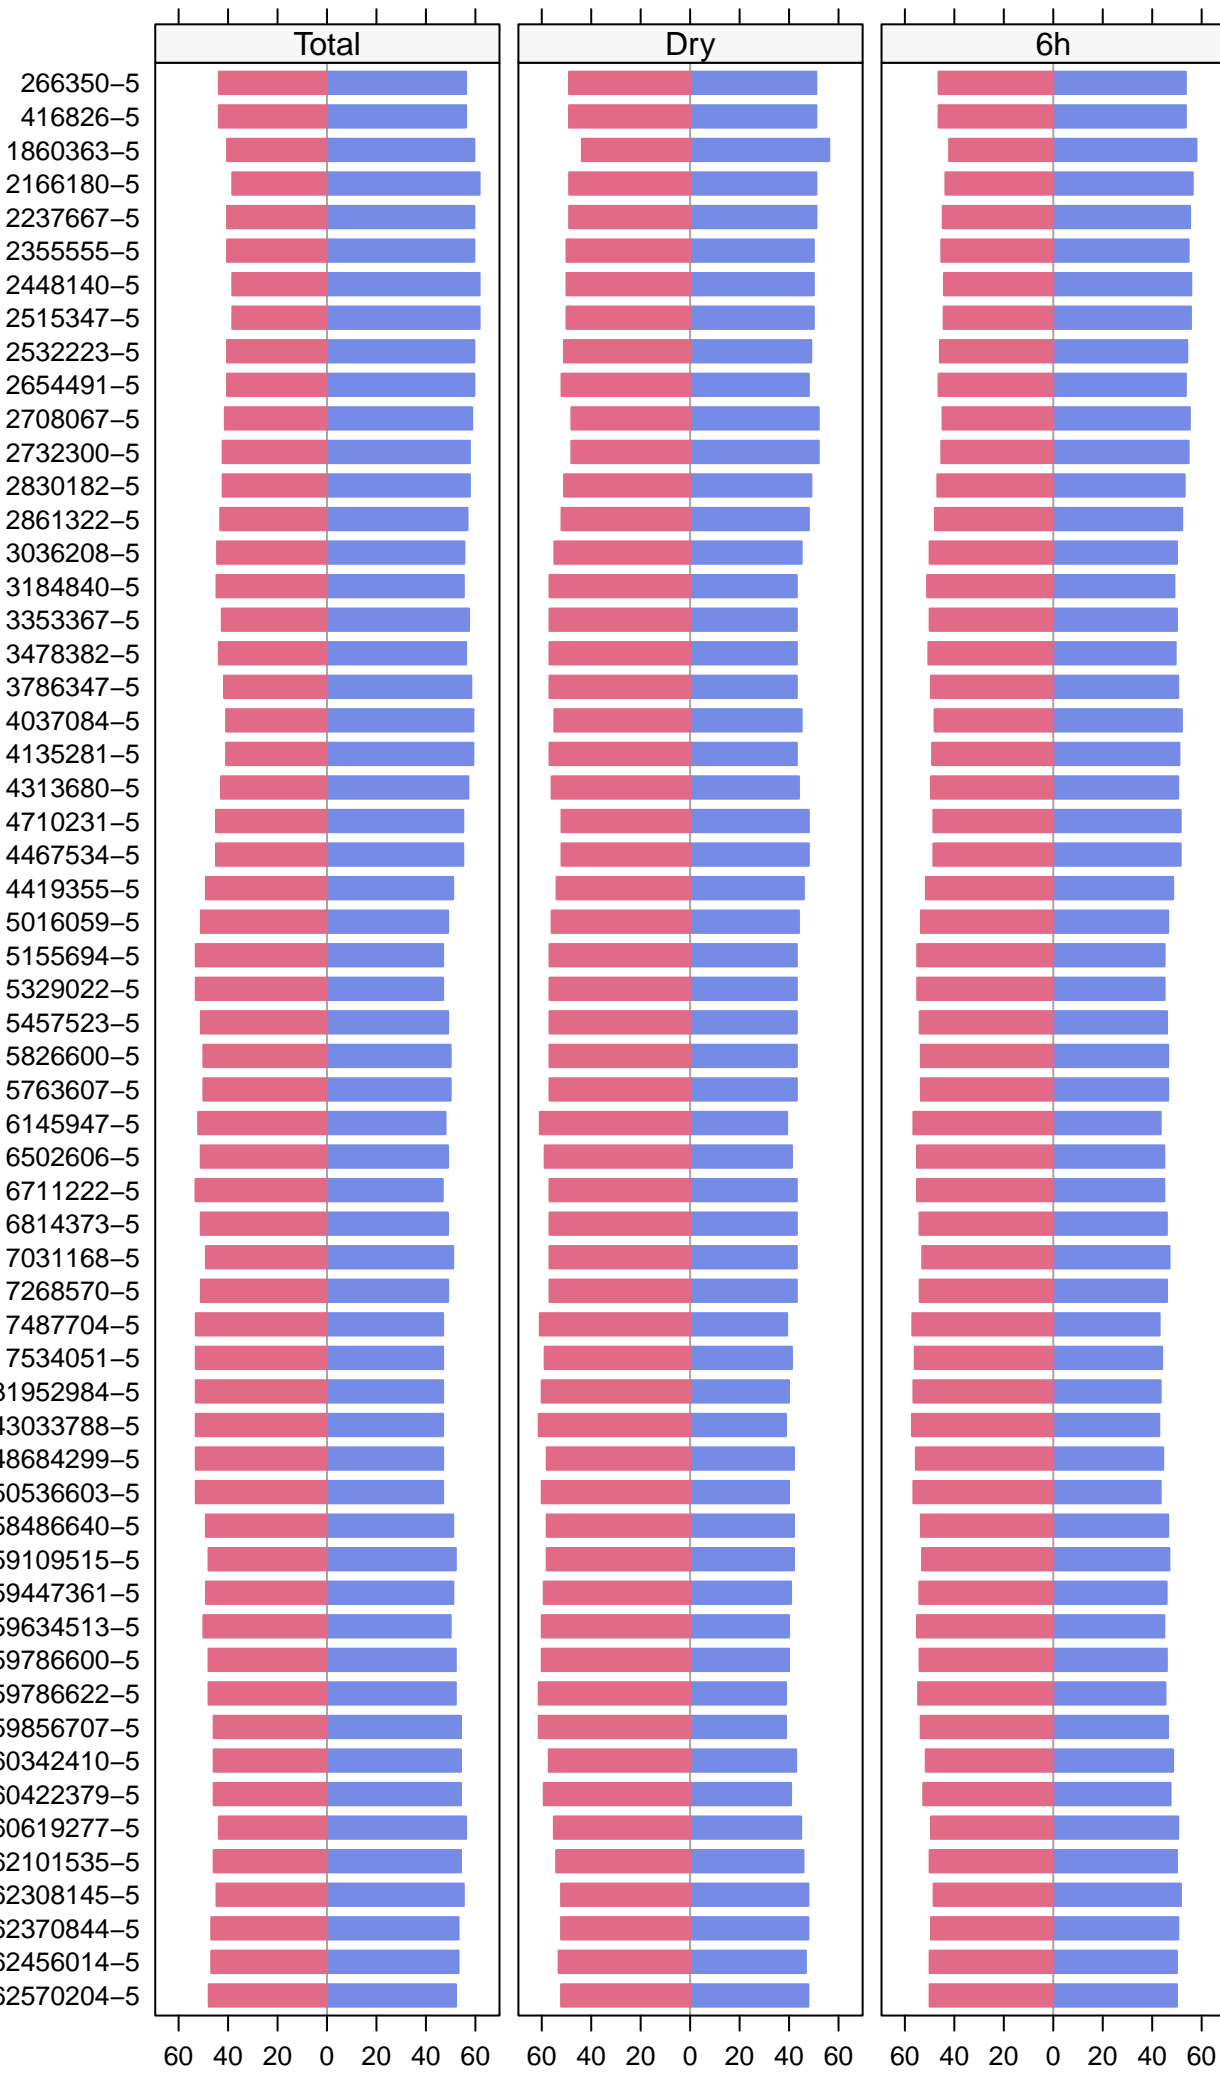

Allele  
A B

# Chromosome 6

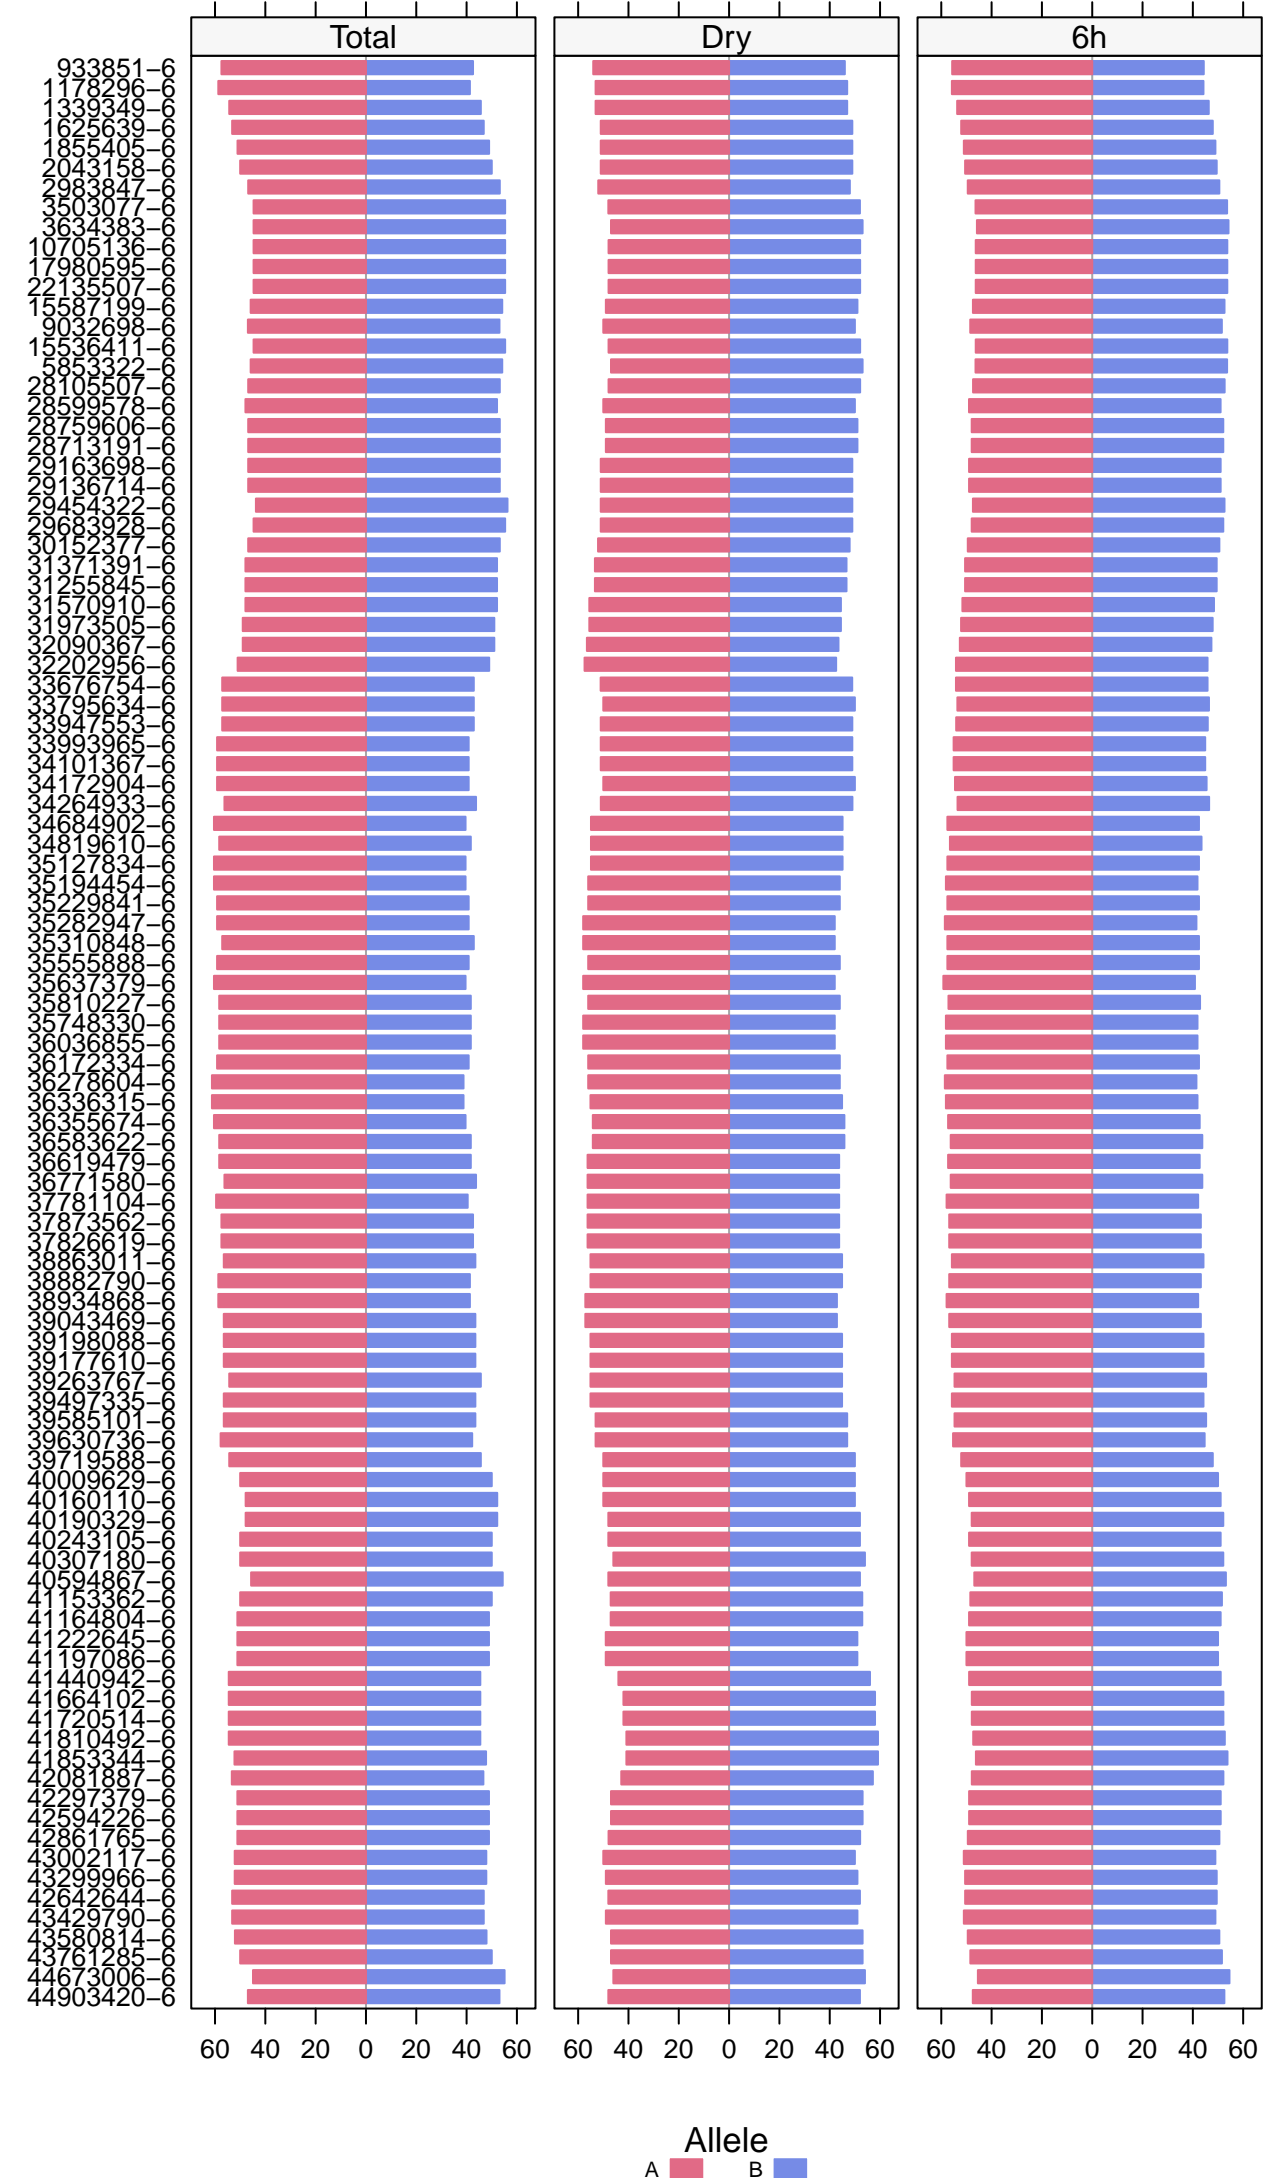

# Chromosome 7

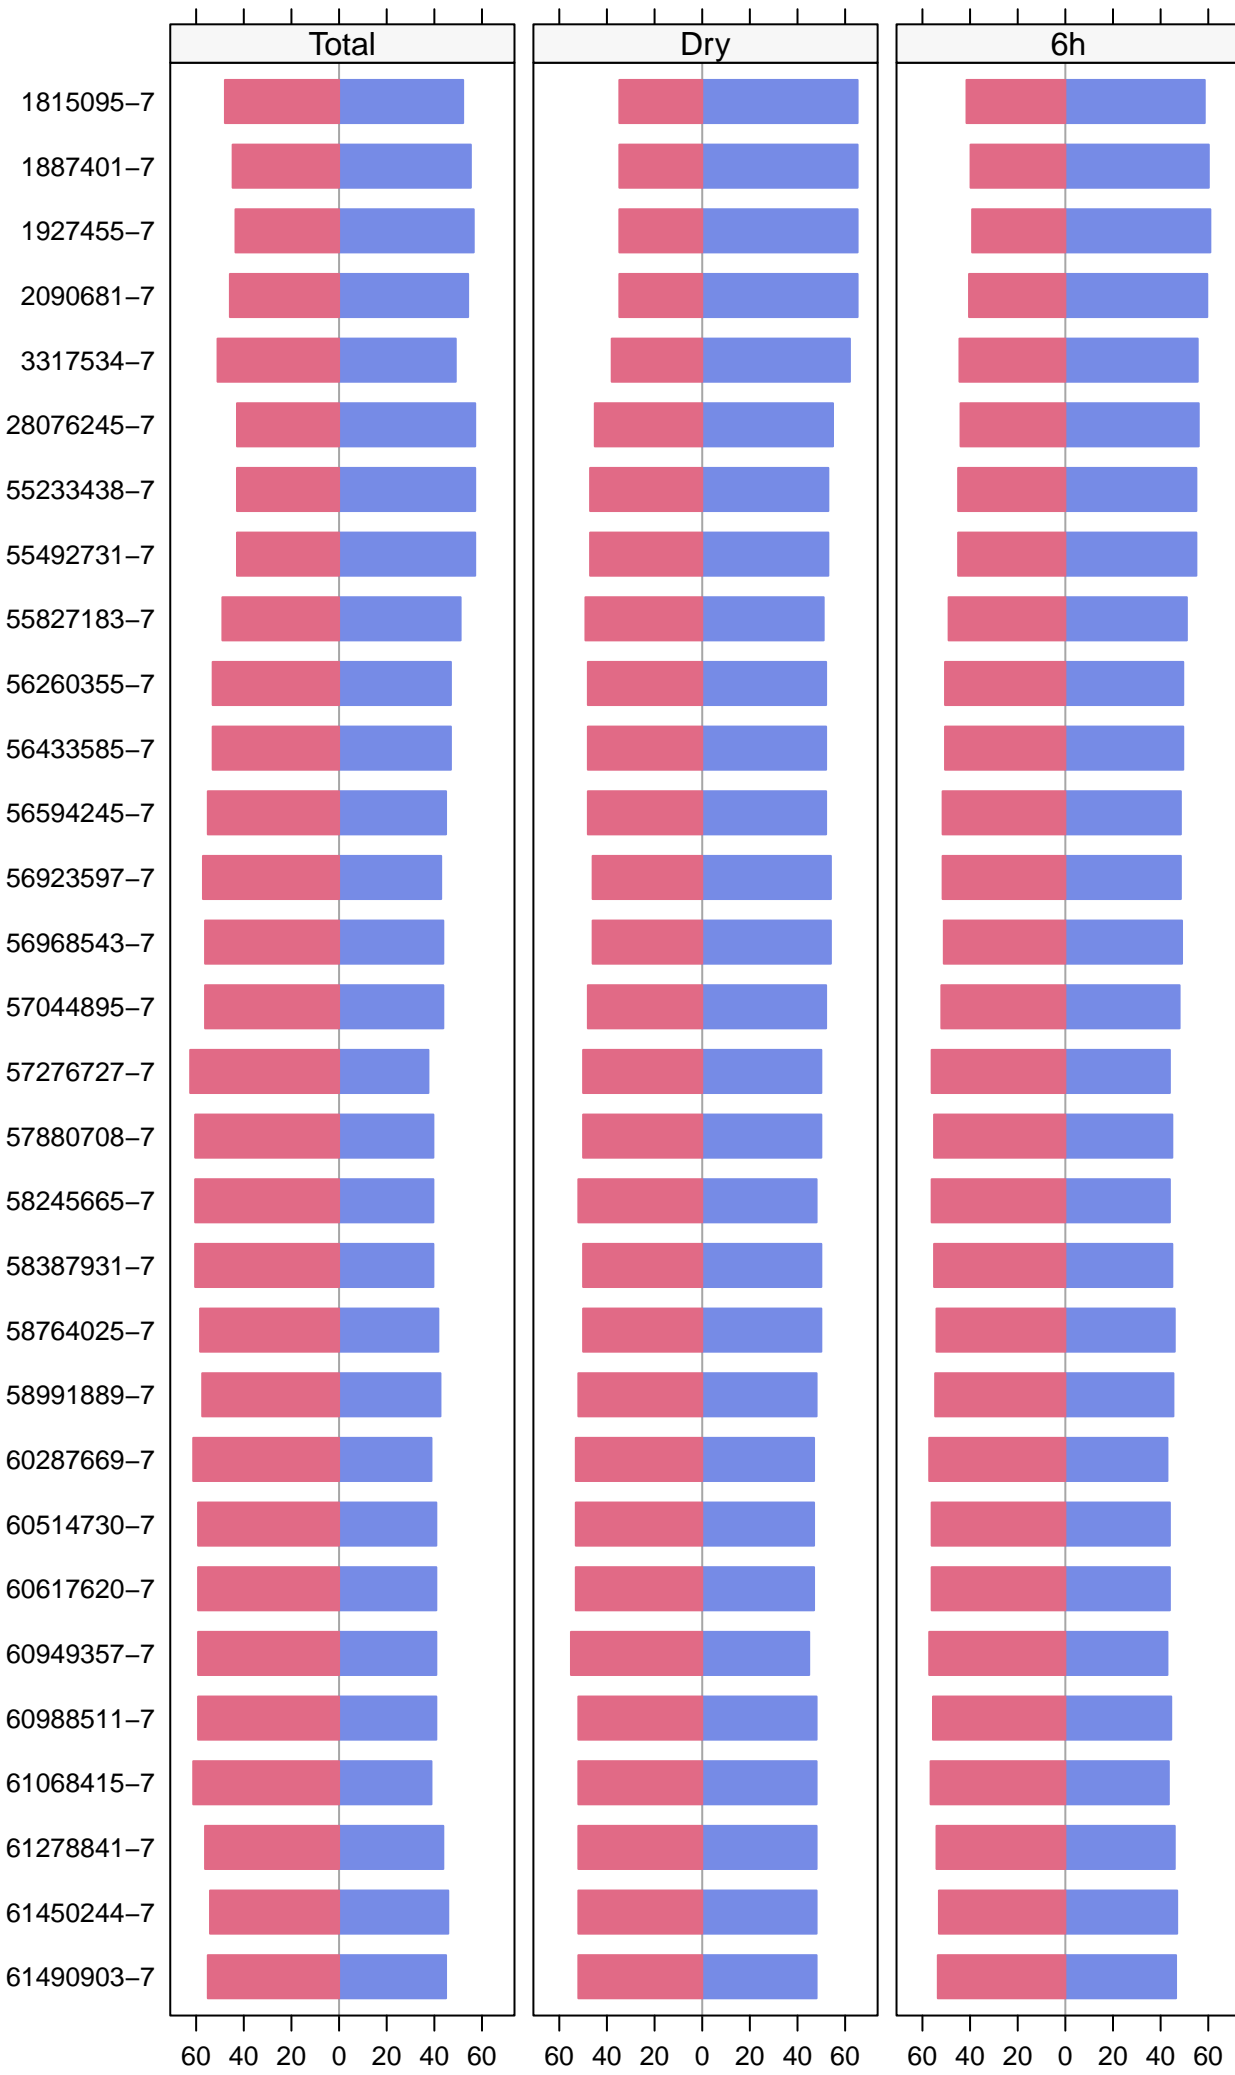

Allele  
A B

# Chromosome 8

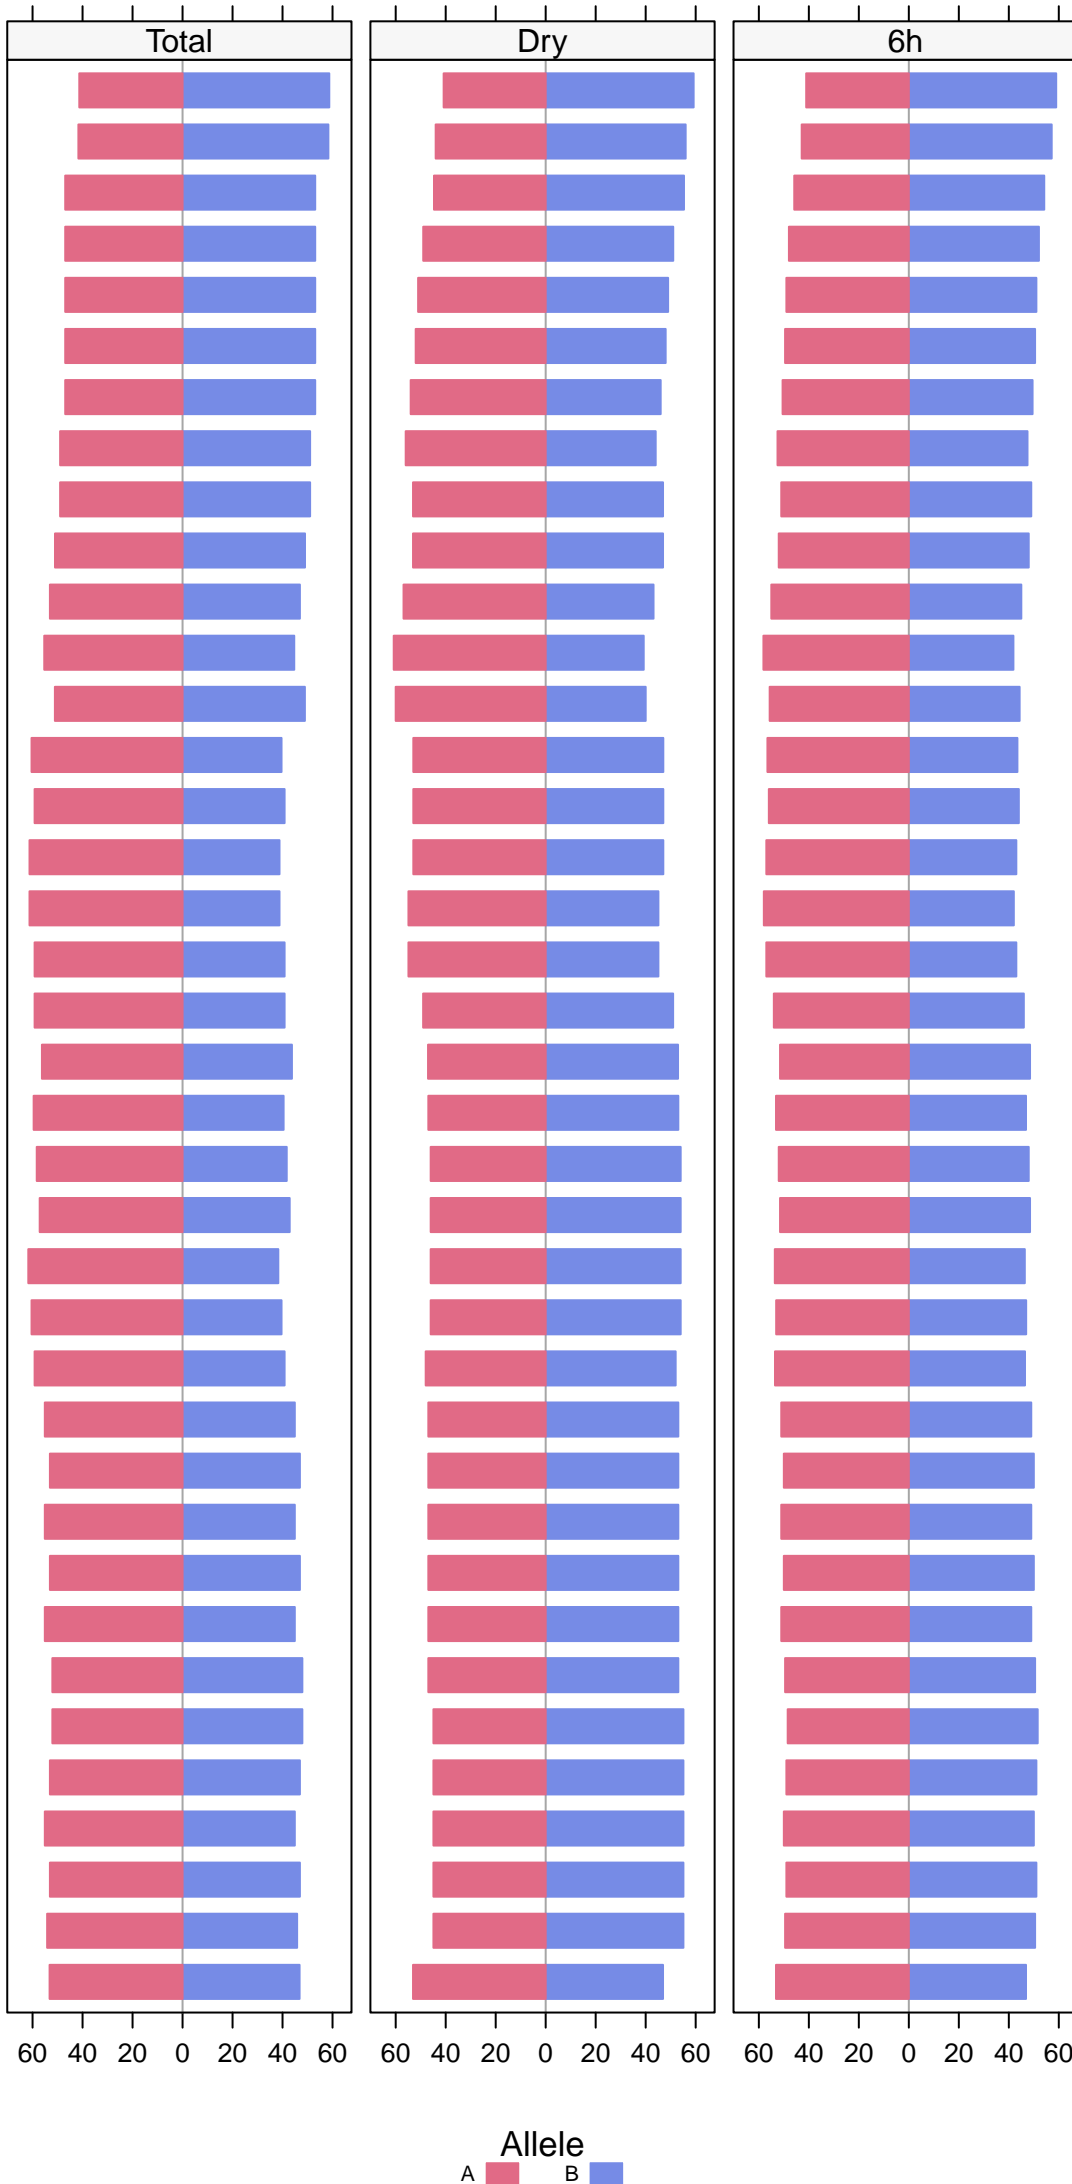

Allele  
A ■ B ■



# Chromosome 9

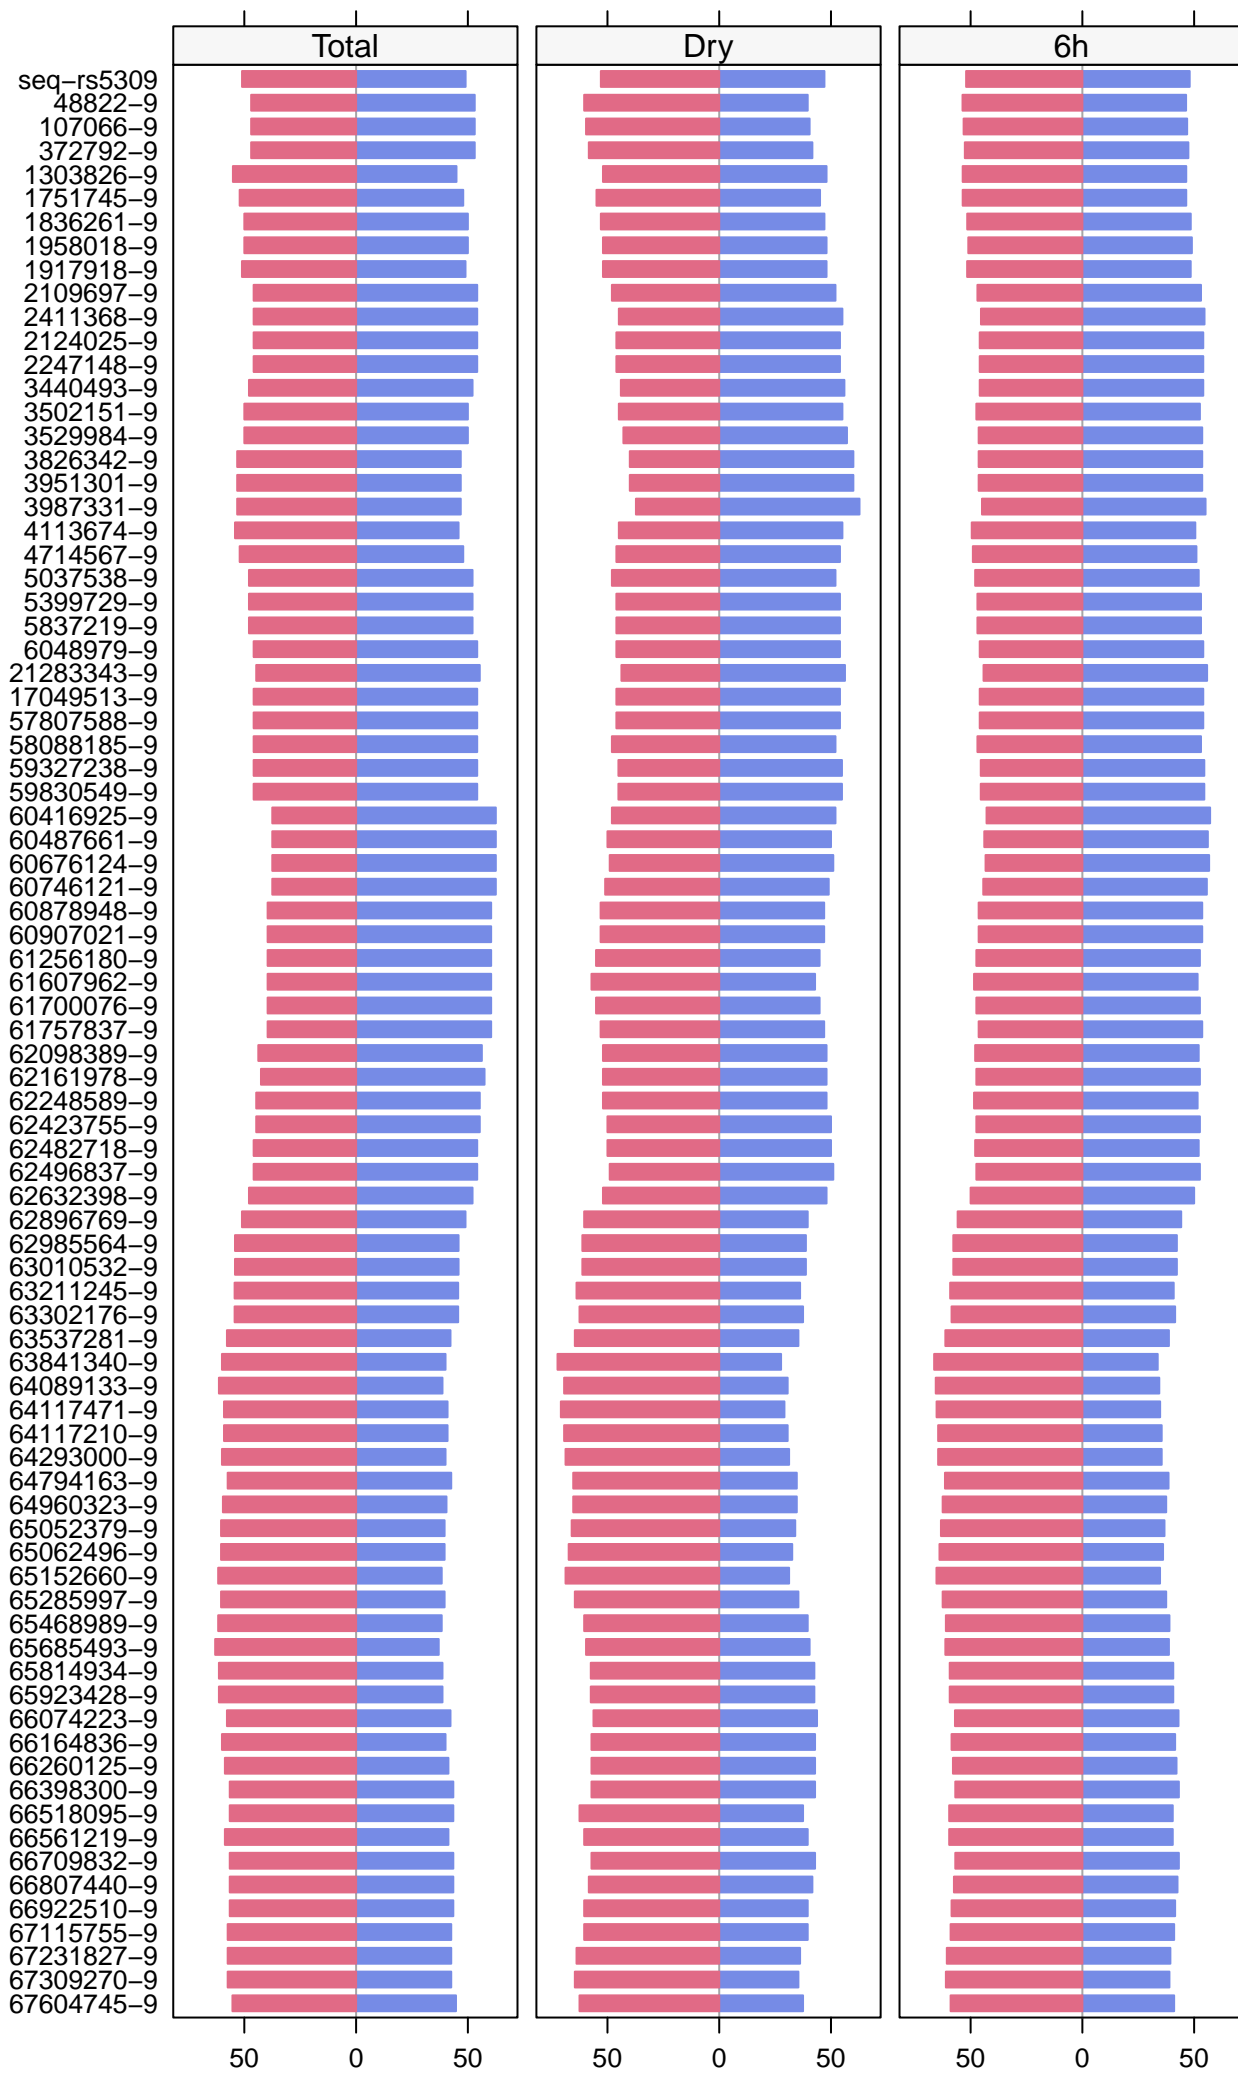

Allele  
A B

# Chromosome 10

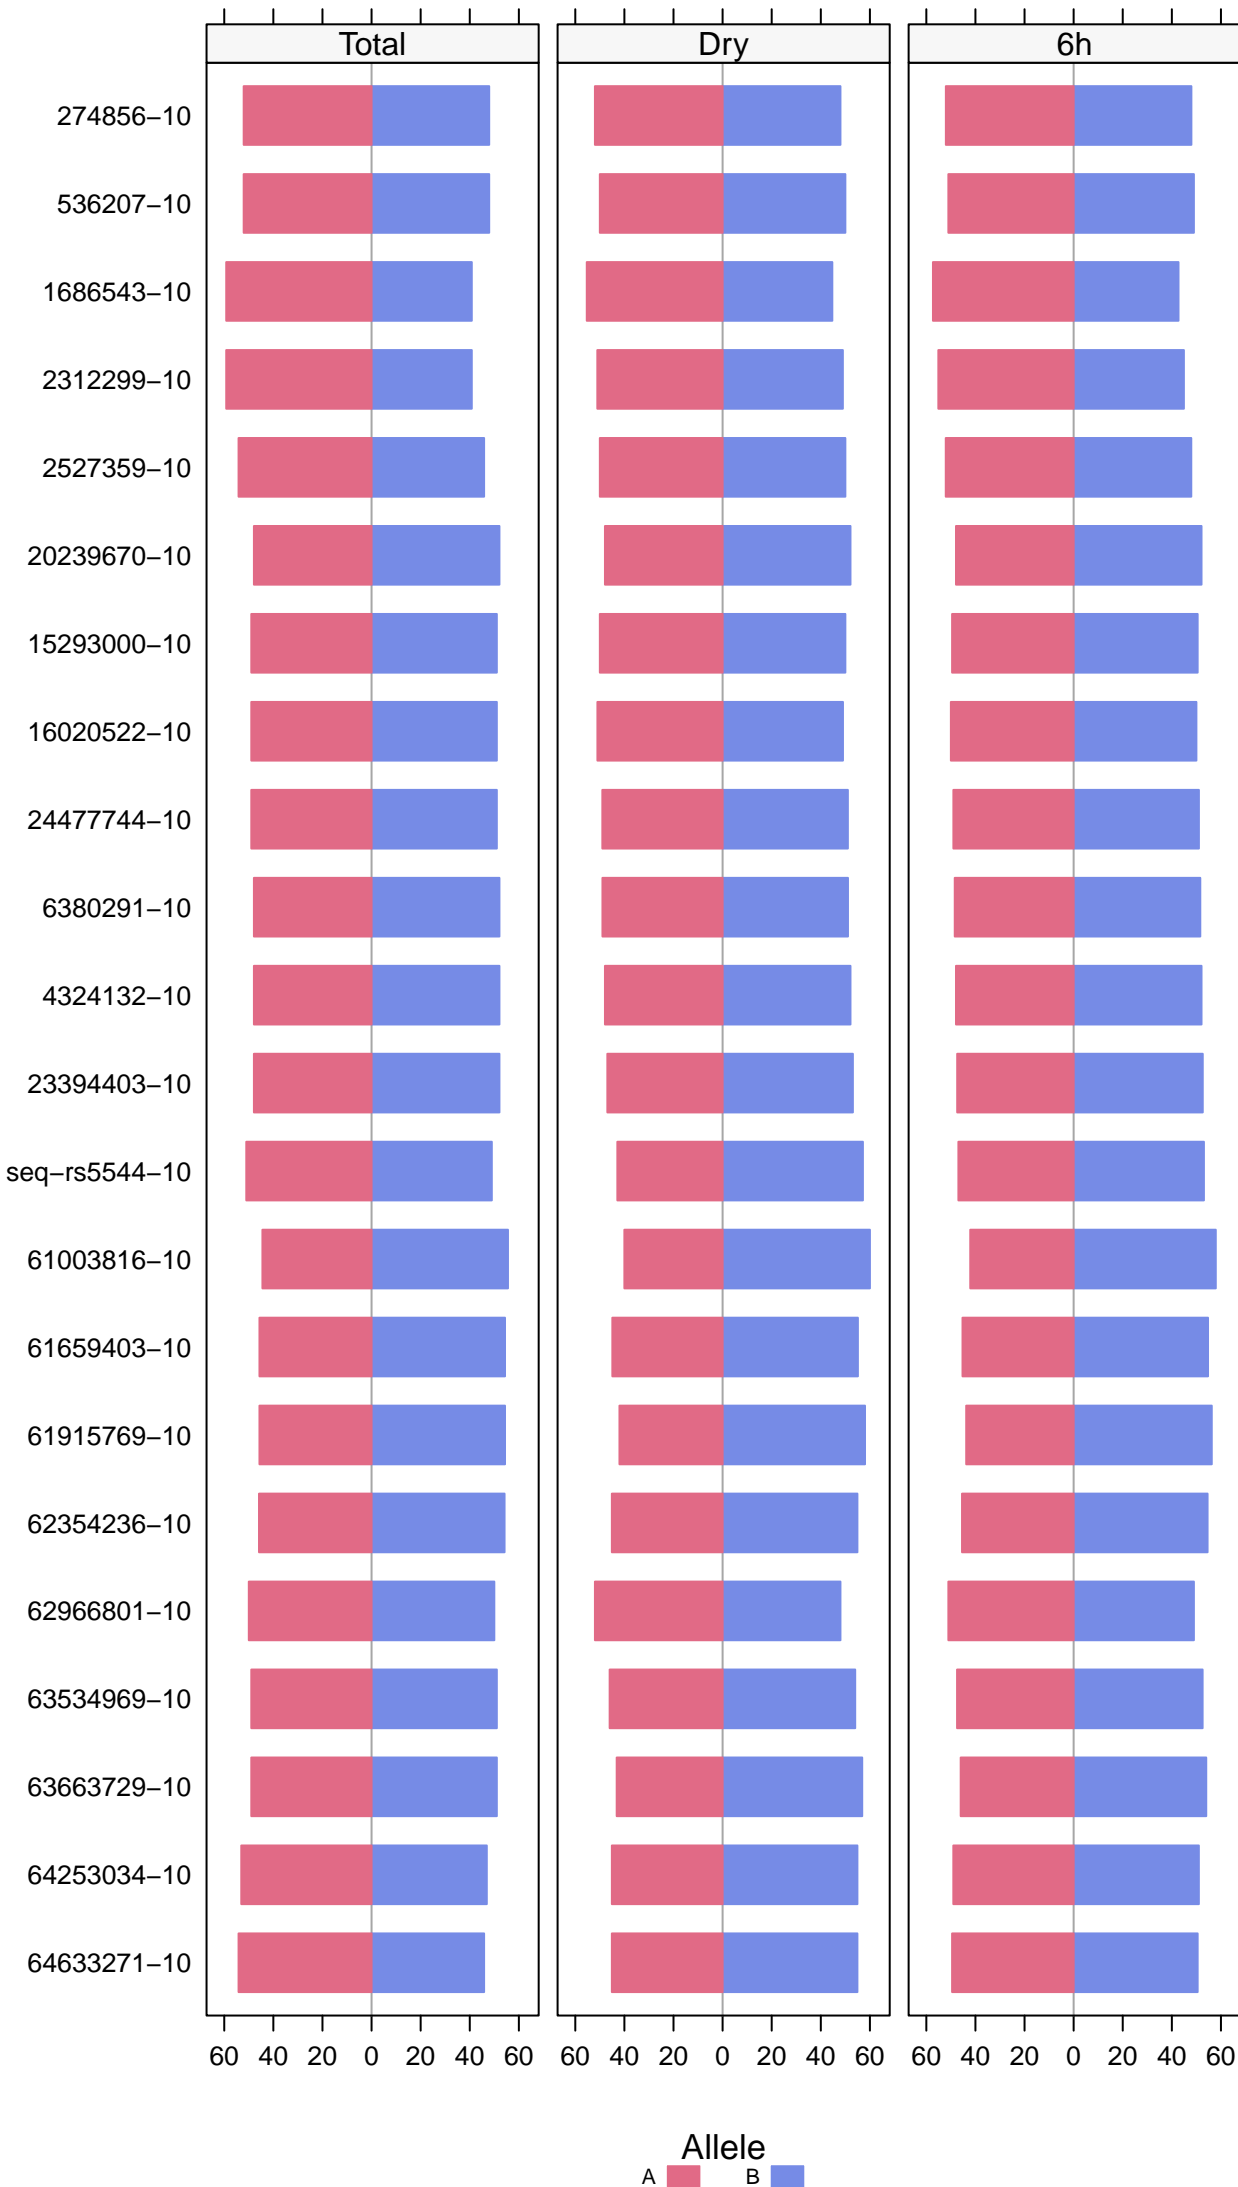

# Chromosome 11

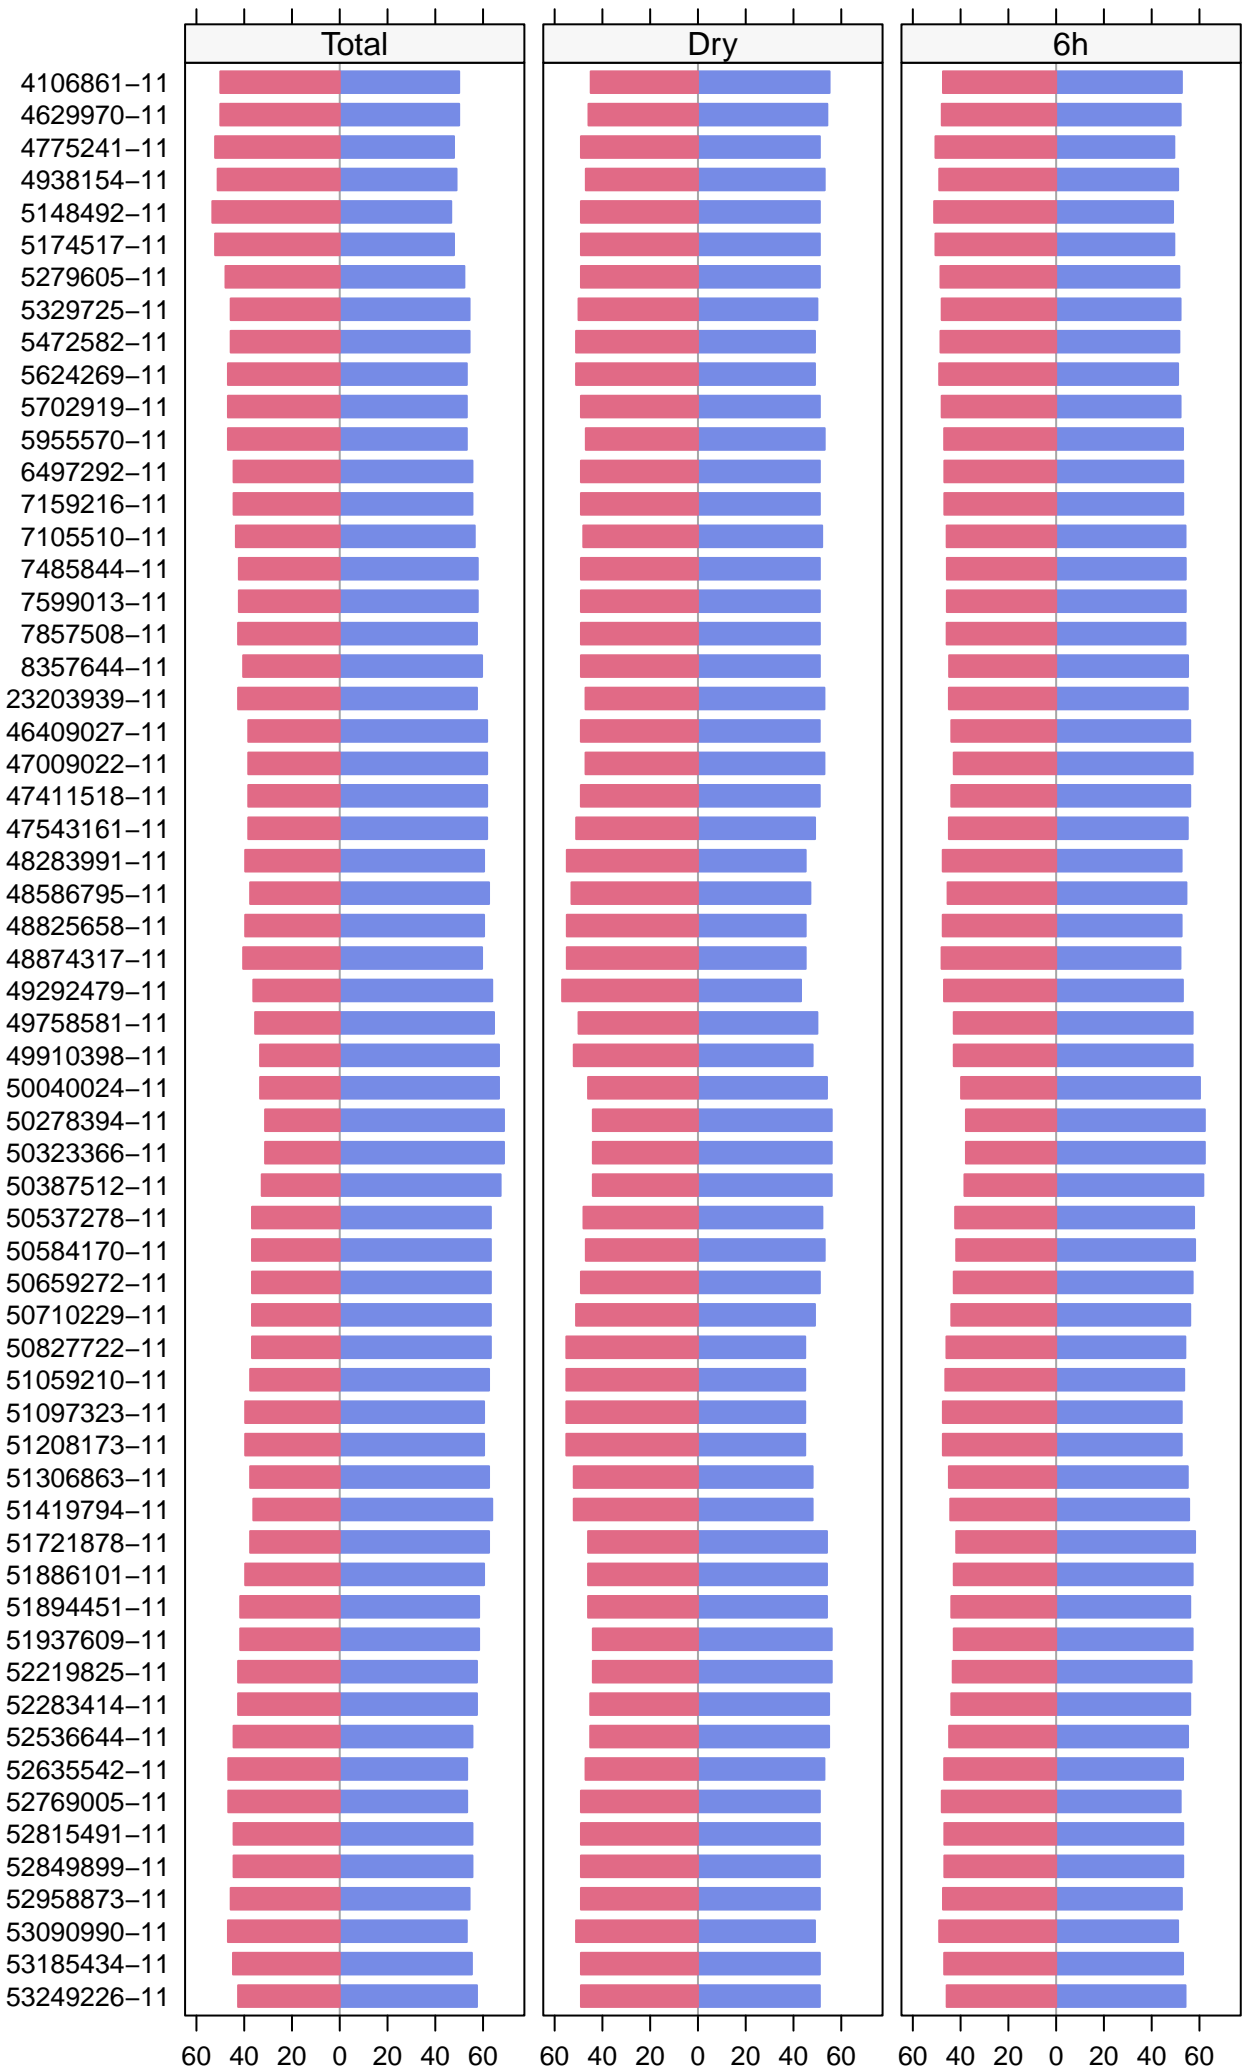

Allele  
A ■ B ■

# Chromosome 12

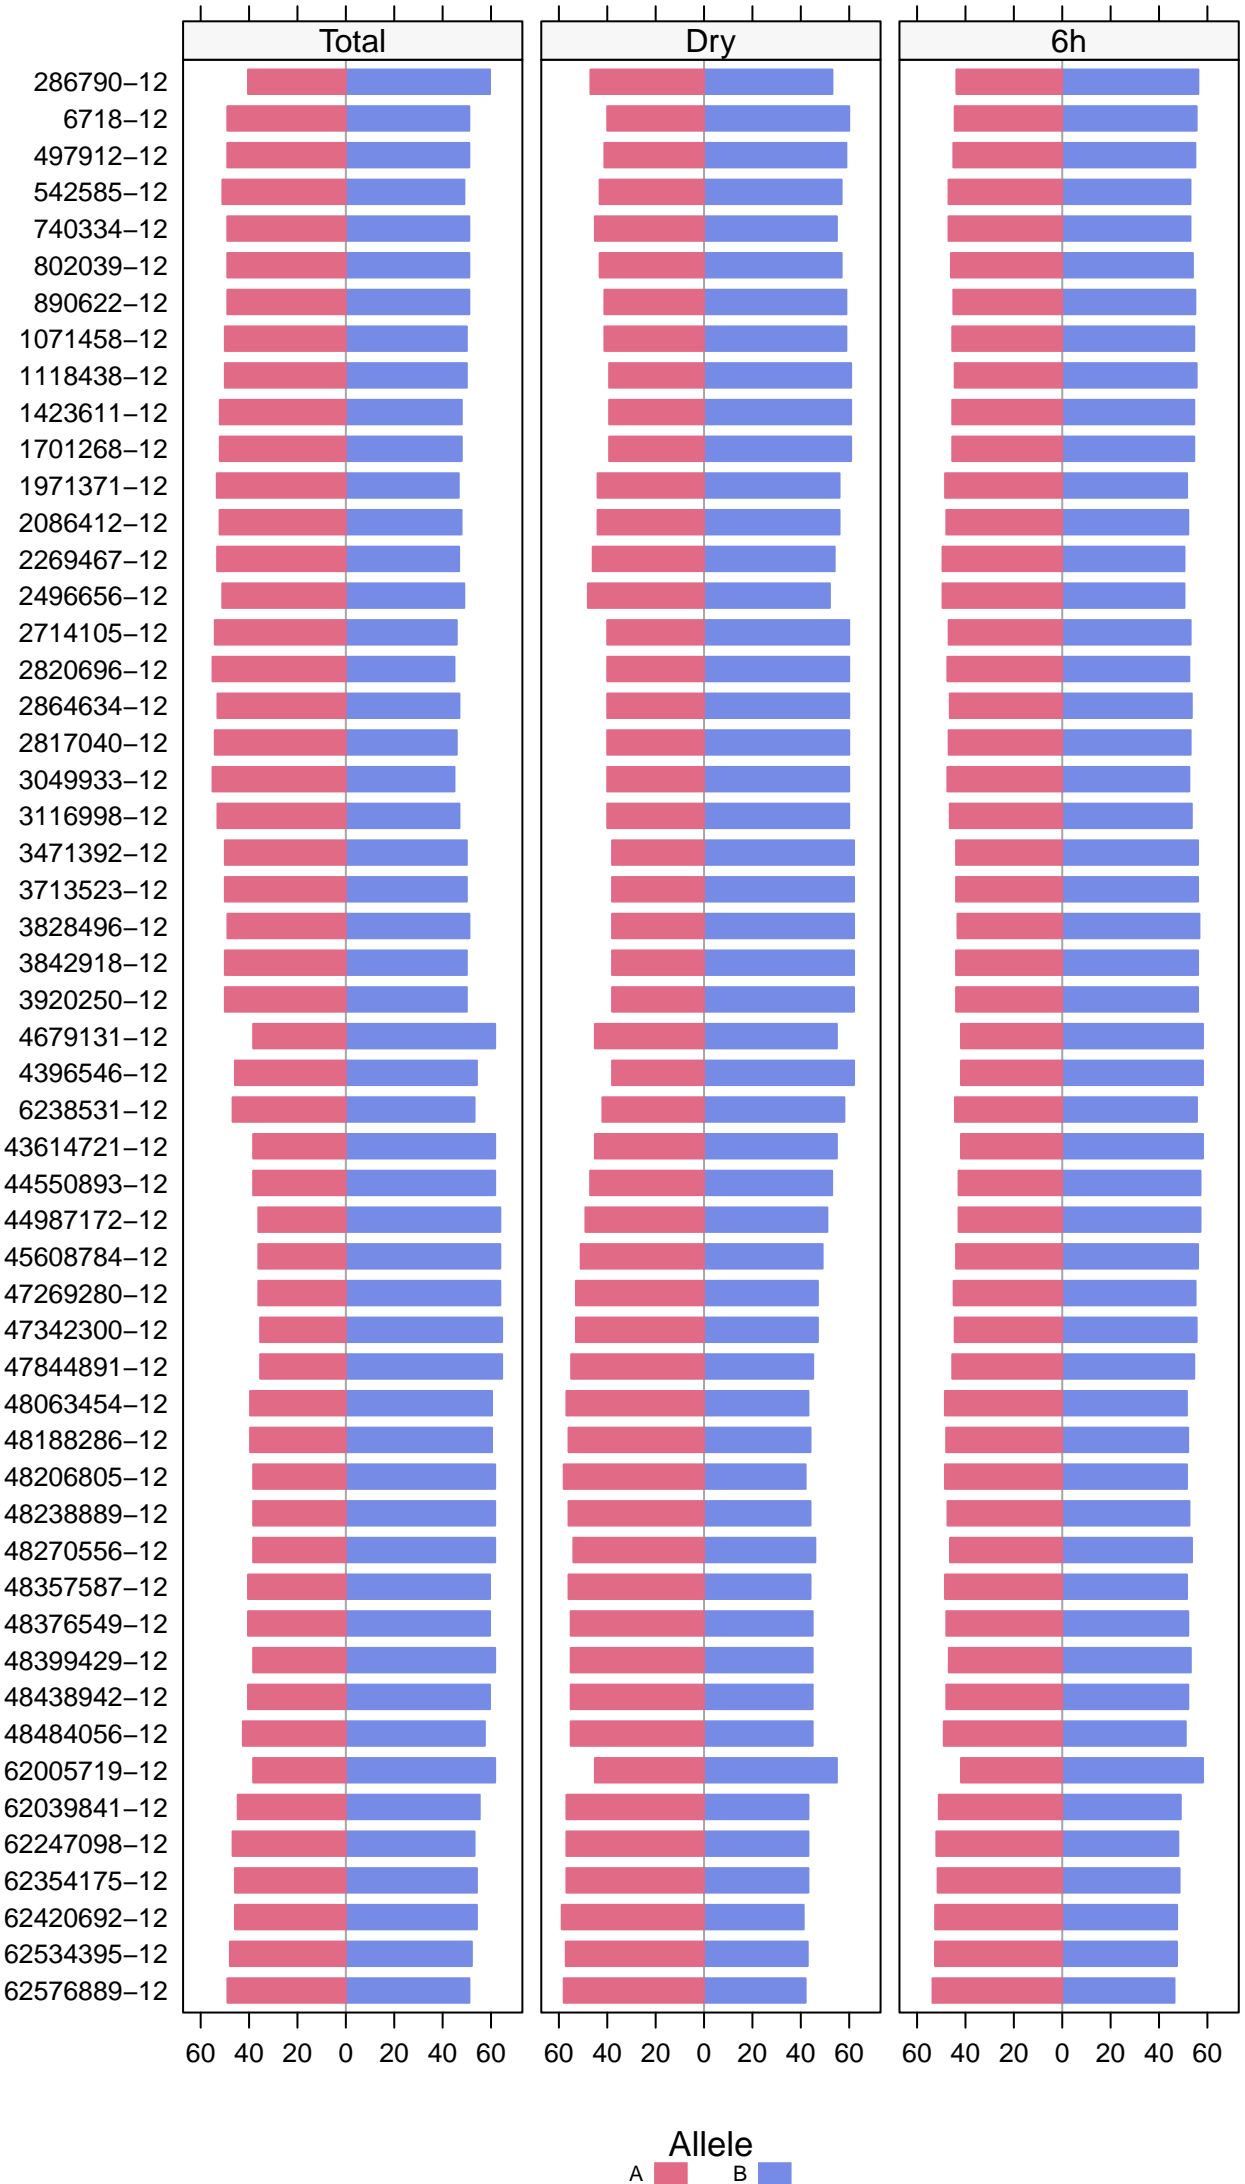

**Supplemental Figure 1.** Intelligent allocation of 100 RILs population to two sub-populations. The core population of 100 RILs was divided in two subpopulations (i.e. 50 RILs for dry and 50 RILs for 6h imbibed seeds) optimized for the distribution of parental alleles using the R package DesignGG, aiming at the most accurate estimate of  $G$  and  $G:E$  effects.
